# Supplementary figures and images for: Mechanisms of GII.4 Norovirus Persistence in Human Populations
Source: PLOS journal article supplement (doi:10.1371/journal.pmed.0050031), 2008-02-06

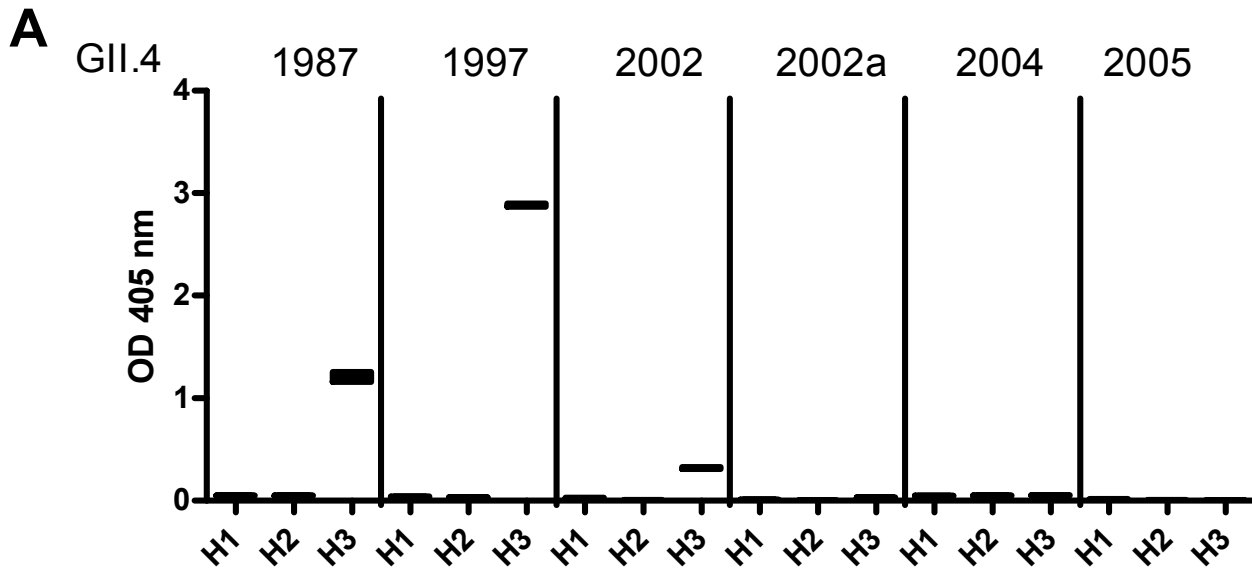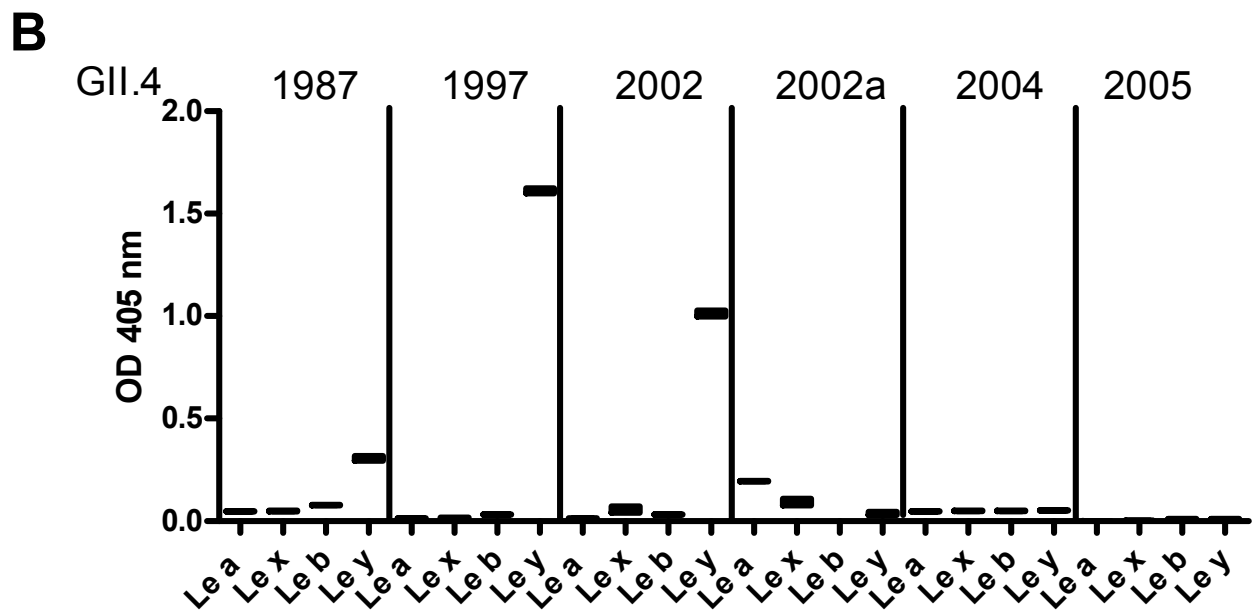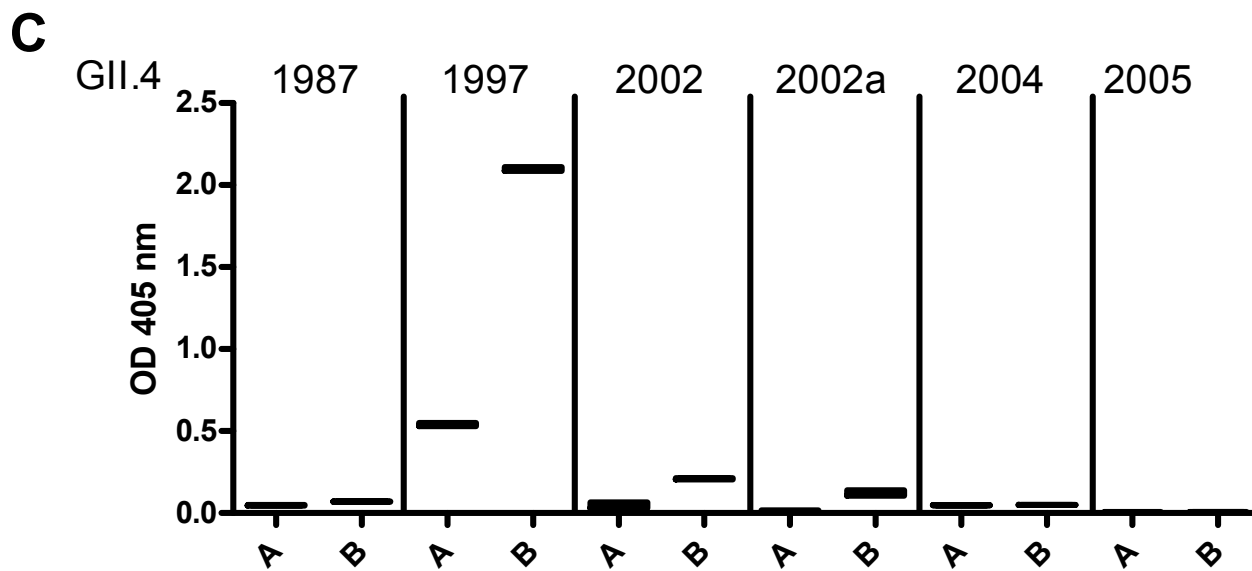

Supplement: S17 (10.1371/journal.pmed.0050031.s017) [file journal.pmed.0050031.s017]
